# Supplementary material
Source: Springer Nature journal article supplement (https://www.springerprofessional.de/resource/supplementary/13673_2012_41_MOESM3_ESM.pdf/11899370)

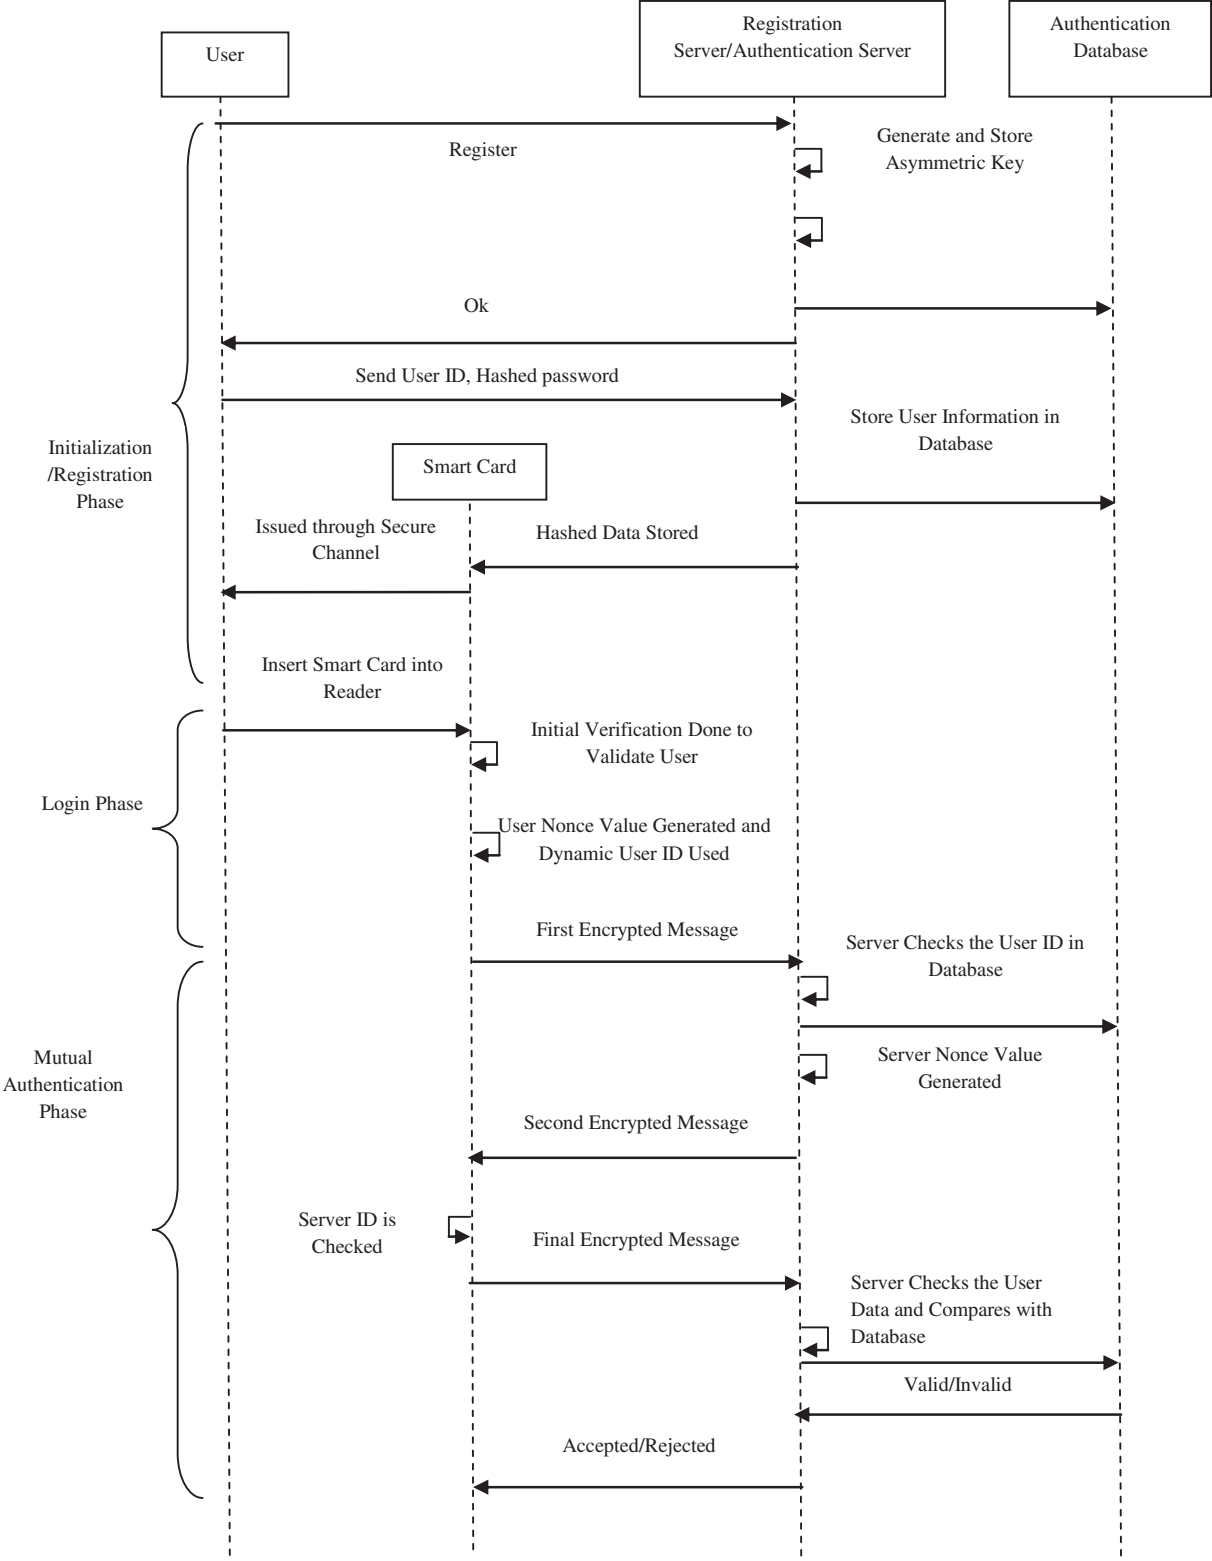

Supplement: MOESM3 [file 11899370]
